# Supplementary material
Source: PubMed Central journal article supplement (PMC10081964)
Supplement: NIHMS1874746-supplement-1.pdf [file NIHMS1874746-supplement-1.pdf]

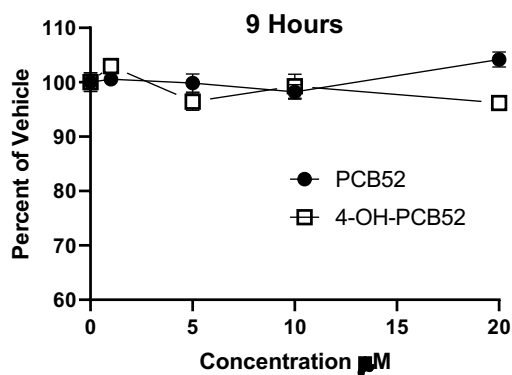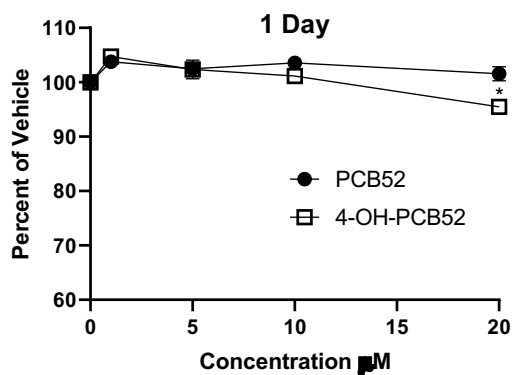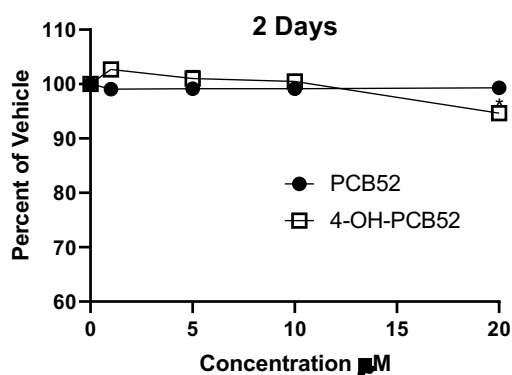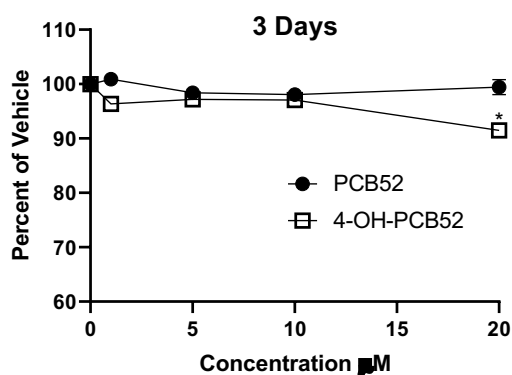

Supplemental Figure 1: Cytotoxicity assay (Cell Titer Glo) of PCB52 or 4-OH-PCB52 on human preadipocytes over a time course. \*  $p \leq 0.05$ , One-way ANOVA comparing values to vehicle control (0 concentration).

A

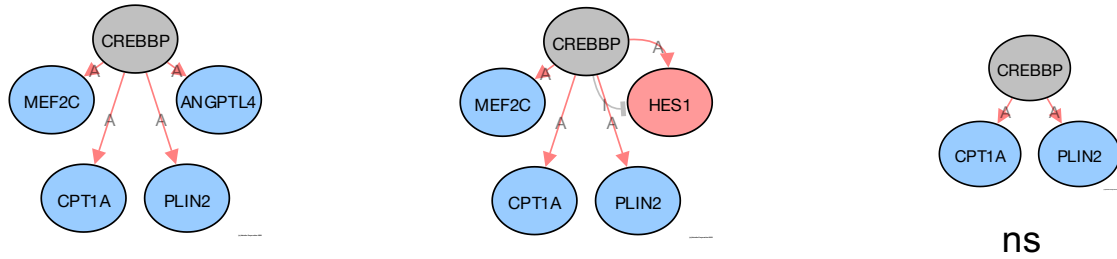

B

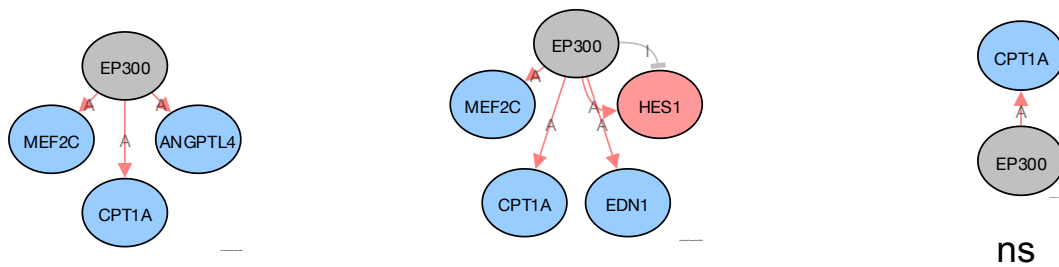

Supplemental Figure 2: Additional predicted upstream regulators affected by PCB52. A. Inhibition of CREBBP at different time points by PCB52, B. Inhibition of EP300 by PCB52 at different time points. Red Oval: Upregulated (actual); Blue Oval: Downregulated (actual); Gray or White oval: Unchanged or undetected (actual); “A”: Activated (predicted); “E”: Expression Inhibited (predicted); “I”: Inhibited (predicted); →Activation (predicted); ⊥ Inhibition (predicted). Except where indicated, all pathways are significant ( $p \leq 0.05$ ,  $FDR \leq 0.05$ ). ns=nonsignificant

Supplemental Table 1A: PCB52 upregulated genes at 9 hours

| symbol     | Log2fc   | adjpv*   |
|------------|----------|----------|
| CSGALNACT1 | 0.889717 | 0.000001 |
| CHRD2      | 0.876761 | 0.020793 |
| PTGES      | 0.629335 | 0.002235 |
| SULT1E1    | 0.627006 | 0.041020 |
| TFPI2      | 0.594026 | 0.000001 |
| IMMP2L     | 0.586874 | 0.011473 |
| BMP6       | 0.560740 | 0.000001 |
| LINC02604  | 0.553536 | 0.043008 |
| PDE4D      | 0.546889 | 0.018098 |
| TM4SF1     | 0.541635 | 0.000001 |
| SMOX       | 0.515410 | 0.000001 |
| FAM167A    | 0.509387 | 0.000353 |
| SEMA3F     | 0.479837 | 0.013454 |
| STC1       | 0.469472 | 0.025140 |
| PDE7B      | 0.460571 | 0.000633 |
| DCLRE1C    | 0.447649 | 0.032024 |
| BARD1      | 0.438946 | 0.001726 |
| IKBKB      | 0.434680 | 0.011157 |
| SLC22A15   | 0.430783 | 0.042879 |
| UVSSA      | 0.420120 | 0.011180 |
| GDF15      | 0.411225 | 0.000216 |
| GK         | 0.386191 | 0.000395 |
| PKD1P6     | 0.375816 | 0.043677 |
| PTGS1      | 0.372802 | 0.003269 |
| CEACAM19   | 0.367937 | 0.015790 |
| WHRN       | 0.362800 | 0.041010 |
| DUSP4      | 0.359801 | 0.000032 |
| STAMBPL1   | 0.351120 | 0.000201 |
| AFAP1L1    | 0.342500 | 0.018033 |
| TRIM62     | 0.341985 | 0.000001 |
| TRIB3      | 0.341023 | 0.000001 |
| SLC3A2     | 0.338151 | 0.000001 |
| FGF7       | 0.337375 | 0.008911 |
| UNC5B      | 0.328582 | 0.000005 |
| PC         | 0.322804 | 0.003095 |
| HMOX1      | 0.320821 | 0.000001 |
| VLDLR      | 0.317782 | 0.000081 |
| PAPPA      | 0.316474 | 0.000001 |
| PPP1R3B    | 0.306292 | 0.000001 |
| EPB41L1    | 0.302369 | 0.004568 |

\*FDR $\leq$ 0.05, adjusted p-values of less than 0.000001 are listed as 0.000001

Supplemental Table 1B: PCB52 downregulated genes at 9 hours

| <b>symbol</b> | <b>Log2fc</b> | <b>Adjpv*</b> |
|---------------|---------------|---------------|
| C16orf89      | -1.606325     | 0.002973      |
| ANGPTL4       | -1.215362     | 0.000001      |
| PLIN2         | -0.831364     | 0.000001      |
| CHI3L1        | -0.723843     | 0.038687      |
| IL34          | -0.684815     | 0.031157      |
| SLC25A20      | -0.622422     | 0.000001      |
| TMEM135       | -0.600529     | 0.032024      |
| TRHDE-AS1     | -0.579544     | 0.049599      |
| SLC2A12       | -0.578799     | 0.033109      |
| TRIM52        | -0.545188     | 0.008206      |
| KCNQ3         | -0.500268     | 0.041020      |
| CPT1A         | -0.496839     | 0.000001      |
| ACAA2         | -0.442267     | 0.000001      |
| RGS7BP        | -0.426259     | 0.000003      |
| FMN2          | -0.420828     | 0.019966      |
| HAND2         | -0.371960     | 0.004590      |
| OXTR          | -0.355206     | 0.000001      |
| PIGN          | -0.350771     | 0.009442      |
| KCNS2         | -0.346029     | 0.015604      |
| SHISA3        | -0.343563     | 0.025826      |
| OSR2          | -0.337884     | 0.002267      |
| MEF2C         | -0.330182     | 0.046846      |
| TENM3-AS1     | -0.321361     | 0.035981      |
| POP1          | -0.319909     | 0.001298      |
| RHOBTB1       | -0.312744     | 0.000146      |
| SERPINB2      | -0.306431     | 0.000001      |
| PLK2          | -0.306325     | 0.000001      |
| ICK           | -0.303543     | 0.000001      |
| ECH1          | -0.300714     | 0.000057      |

\*FDR $\leq$ 0.05, adjusted p-values of less than 0.000001 are listed as 0.000001

Supplemental Table 2A: 4-OH-PCB52 upregulated genes at 9 hours (top 50, fold-change)

| symbol         | Log2fc   | adjpv*   |
|----------------|----------|----------|
| STMN2          | 2.836531 | 0.000001 |
| FGL2           | 2.028982 | 0.000001 |
| GUCY1A2        | 1.732489 | 0.039792 |
| SULT1E1        | 1.675065 | 0.000001 |
| SAMD11         | 1.568253 | 0.000001 |
| CD34           | 1.564996 | 0.000001 |
| EMCN           | 1.370015 | 0.000997 |
| PI16           | 1.348241 | 0.000001 |
| FRMD3          | 1.324468 | 0.000001 |
| ACTC1          | 1.232997 | 0.000004 |
| NXPH2          | 1.149418 | 0.000001 |
| TRIM29         | 1.128593 | 0.002349 |
| LINC02593      | 1.127672 | 0.000001 |
| SLC25A34       | 1.126792 | 0.047784 |
| DDIT4L         | 1.116869 | 0.000001 |
| ATP6AP1L       | 1.094684 | 0.006366 |
| CAVIN2         | 1.044042 | 0.000001 |
| ID4            | 1.03977  | 0.000004 |
| ZBED9          | 1.008998 | 0.014009 |
| PTGES          | 1.001543 | 0.000001 |
| DLGAP1         | 0.970252 | 0.000003 |
| GREM2          | 0.962859 | 0.000001 |
| OLFM1          | 0.958008 | 0.024724 |
| TM6SF1         | 0.942599 | 0.038376 |
| OPCML          | 0.929213 | 0.027426 |
| TMEM233        | 0.925797 | 0.016528 |
| PTPRZ1         | 0.91132  | 0.041687 |
| SLC16A14       | 0.89028  | 0.000754 |
| SYT15          | 0.884689 | 0.000001 |
| NMU            | 0.880266 | 0.000001 |
| MEX3B          | 0.878975 | 0.000001 |
| FKBP9P1        | 0.855731 | 0.000413 |
| CLDN4          | 0.836562 | 0.000001 |
| NPAS1          | 0.826778 | 0.000273 |
| SBSPON         | 0.825636 | 0.000001 |
| MYCT1          | 0.820013 | 0.000002 |
| ELN            | 0.818843 | 0.000001 |
| PPP1R14C       | 0.813534 | 0.000630 |
| LMO2           | 0.804066 | 0.000001 |
| MYO16          | 0.801169 | 0.009055 |
| PDE4D          | 0.796192 | 0.000007 |
| C19orf33       | 0.792058 | 0.021358 |
| RPL17-C18orf32 | 0.791087 | 0.005064 |
| CPXM1          | 0.789321 | 0.040601 |
| METTL24        | 0.785691 | 0.009055 |
| TMEM187        | 0.772212 | 0.003580 |
| SMAD6          | 0.771615 | 0.000001 |
| AADAC          | 0.759861 | 0.000001 |
| SAA1           | 0.757565 | 0.000001 |
| ADGRD1         | 0.752412 | 0.000001 |

\*FDR $\leq$ 0.05, adjusted p-values of less than 0.000001 are listed as 0.000001

Supplemental Table 2B: 4-OH-PCB52 downregulated genes at 9 hours (top 50, fold change)

| symbol    | Log2fc    | adjpv    |
|-----------|-----------|----------|
| MEF2B     | -3.539807 | 0.000476 |
| CLMN      | -2.816200 | 0.023012 |
| PKNOX2    | -1.835011 | 0.000001 |
| DPT       | -1.670266 | 0.017984 |
| KCNIP3    | -1.570867 | 0.000330 |
| PCDHGB2   | -1.437321 | 0.000603 |
| TMEM119   | -1.421070 | 0.000010 |
| CCL7      | -1.395466 | 0.008904 |
| LDB3      | -1.306652 | 0.001895 |
| C16orf89  | -1.224416 | 0.018789 |
| NFE2      | -1.206250 | 0.000249 |
| FER1L6    | -1.162507 | 0.013170 |
| RRAD      | -1.153074 | 0.000001 |
| RIPOR3    | -1.133637 | 0.002311 |
| FRMPD4    | -1.104525 | 0.000001 |
| MLPH      | -1.082705 | 0.000001 |
| CDK18     | -1.075203 | 0.003577 |
| RPS6KA5   | -1.062179 | 0.016556 |
| VAT1L     | -1.037990 | 0.000003 |
| CCL2      | -1.025875 | 0.000001 |
| CLIC2     | -1.015818 | 0.000109 |
| POM121L9P | -0.996706 | 0.048294 |
| WWC1      | -0.986392 | 0.000001 |
| KIF5A     | -0.986289 | 0.001217 |
| DNER      | -0.967759 | 0.000001 |
| F2RL1     | -0.967384 | 0.000003 |
| MMP1      | -0.959707 | 0.000001 |
| MACC1     | -0.956922 | 0.033509 |
| CLCA2     | -0.941244 | 0.029690 |
| CHI3L1    | -0.925845 | 0.000782 |
| REPS2     | -0.918664 | 0.027485 |
| WNT5B     | -0.887928 | 0.000001 |
| IGFBP2    | -0.868409 | 0.043971 |
| DPF3      | -0.867480 | 0.000001 |
| MCTP1     | -0.864013 | 0.033541 |
| SECTM1    | -0.843874 | 0.000001 |
| DNM1P51   | -0.843220 | 0.009265 |
| LINC01085 | -0.841825 | 0.001179 |
| COMTD1    | -0.826407 | 0.029427 |
| ALPL      | -0.824273 | 0.001244 |
| CDKN1C    | -0.813170 | 0.034422 |
| IL34      | -0.806564 | 0.002449 |
| ITGA7     | -0.792795 | 0.000001 |
| STEAP1B   | -0.787334 | 0.000001 |
| PPP4R4    | -0.785875 | 0.004822 |
| SCUBE3    | -0.785724 | 0.000001 |
| NPTXR     | -0.740617 | 0.000001 |
| PLA2G6    | -0.738981 | 0.000301 |
| FHDC1     | -0.723725 | 0.000001 |
| CD83      | -0.714411 | 0.000016 |

\*FDR $\leq$ 0.05, adjusted p-values of less than 0.000001 are listed as 0.000001

Supplemental Table 3A: PCB52 upregulated genes at day 1

| symbol     | Log2fc   | adjpv*   |
|------------|----------|----------|
| CRLF1      | 1.147137 | 0.000298 |
| PDE7B      | 0.849403 | 0.000001 |
| F2RL1      | 0.698032 | 0.008221 |
| TFPI2      | 0.637349 | 0.000001 |
| STC1       | 0.587710 | 0.025202 |
| PDE4D      | 0.583247 | 0.005945 |
| CARD16     | 0.557552 | 0.003523 |
| CSGALNACT1 | 0.485872 | 0.001879 |
| FZD8       | 0.477319 | 0.000001 |
| NEGR1      | 0.445268 | 0.000001 |
| SEMA3F     | 0.435924 | 0.039249 |
| RAB27B     | 0.429983 | 0.000001 |
| ESM1       | 0.410112 | 0.022919 |
| PID1       | 0.408627 | 0.000001 |
| HES1       | 0.400401 | 0.005313 |
| CLDN1      | 0.390323 | 0.000019 |
| MME        | 0.373532 | 0.001879 |
| TGM2       | 0.353150 | 0.000620 |
| SIK1       | 0.346353 | 0.028941 |
| DUSP4      | 0.346016 | 0.000087 |
| CD200      | 0.341368 | 0.000001 |
| MAL2       | 0.333375 | 0.004493 |
| BBS12      | 0.326118 | 0.032928 |
| HK2        | 0.316643 | 0.000001 |
| FARS2      | 0.313998 | 0.021173 |
| AVPI1      | 0.313340 | 0.000064 |
| FGF7       | 0.303552 | 0.032634 |

\*FDR $\leq$ 0.05, adjusted p-values of less than 0.000001 are listed as 0.000001

Supplemental Table 3B: PCB52 downregulated genes at day 1

| symbol     | Log2fc    | adjpv*   |
|------------|-----------|----------|
| STRA6      | -1.351298 | 0.000001 |
| COLEC12    | -0.749741 | 0.000113 |
| DHRS3      | -0.736189 | 0.000001 |
| PLIN2      | -0.725401 | 0.000001 |
| SLC25A20   | -0.695765 | 0.000001 |
| ACBD7      | -0.635523 | 0.017083 |
| SPACA6     | -0.630892 | 0.049385 |
| SLC9A3-AS1 | -0.604380 | 0.027564 |
| CPT1A      | -0.582847 | 0.000001 |
| AADAC      | -0.568060 | 0.000087 |
| EDN1       | -0.565355 | 0.029590 |
| ACADVL     | -0.557710 | 0.000001 |
| WNT2B      | -0.530483 | 0.040979 |
| CD14       | -0.505284 | 0.009763 |
| NMU        | -0.461714 | 0.000016 |
| LXN        | -0.451698 | 0.000001 |
| PLAT       | -0.447983 | 0.000001 |
| ACAA2      | -0.439634 | 0.000001 |
| RARRES1    | -0.407546 | 0.002525 |
| DEPP1      | -0.406264 | 0.000554 |
| PDE5A      | -0.388683 | 0.000008 |
| RGS7BP     | -0.380384 | 0.000029 |
| ABCC3      | -0.376930 | 0.000190 |
| ECH1       | -0.368279 | 0.000001 |
| SELPLG     | -0.360385 | 0.044113 |
| MEF2C      | -0.356398 | 0.023930 |
| KLF11      | -0.328909 | 0.000059 |
| TRHDE      | -0.324423 | 0.043409 |
| USP53      | -0.324120 | 0.000001 |
| NMT2       | -0.323549 | 0.000001 |
| MRVI1      | -0.307462 | 0.000615 |
| CCNL1      | -0.302355 | 0.000001 |

\*FDR $\leq$ 0.05, adjusted p-values of less than 0.000001 are listed as 0.000001



Supplemental Table 4A: 4-OH-PCB52 upregulated genes at day 1 (top 50, fold-change)

| symbol      | Log2fc   | adjpv*   |
|-------------|----------|----------|
| STMN2       | 2.481219 | 0.000001 |
| TMEM92      | 2.188332 | 0.014751 |
| FGL2        | 1.774345 | 0.000001 |
| CRLF1       | 1.730639 | 0.000001 |
| THRB        | 1.673100 | 0.011353 |
| EMCN        | 1.603354 | 0.000066 |
| G0S2        | 1.549189 | 0.000200 |
| CD34        | 1.511009 | 0.000001 |
| PTPRU       | 1.475900 | 0.016171 |
| C16orf89    | 1.437298 | 0.003684 |
| FAM43B      | 1.413390 | 0.000614 |
| PTPRZ1      | 1.401216 | 0.000418 |
| PI16        | 1.219118 | 0.000001 |
| TMEM220-AS1 | 1.210209 | 0.017873 |
| MYCT1       | 1.205785 | 0.000001 |
| SULT1E1     | 1.200876 | 0.000001 |
| TENM2       | 1.161443 | 0.004610 |
| SEMA4G      | 1.153532 | 0.011285 |
| METTL24     | 1.119265 | 0.000011 |
| SBSPON      | 1.113316 | 0.000001 |
| NXPH2       | 1.108162 | 0.000001 |
| FAT3        | 1.107126 | 0.028153 |
| PDE1A       | 1.066174 | 0.000504 |
| FRMD3       | 1.049003 | 0.008437 |
| CKB         | 1.026717 | 0.000001 |
| BCDIN3D-AS1 | 0.998230 | 0.038292 |
| HTR2A       | 0.995711 | 0.022230 |
| PLCE1-AS1   | 0.995401 | 0.004784 |
| PDZD7       | 0.958370 | 0.044281 |
| ADA2        | 0.950931 | 0.014508 |
| NPAS1       | 0.928078 | 0.001562 |
| CAVIN2      | 0.925061 | 0.000001 |
| LINC02593   | 0.919908 | 0.000176 |
| COMP        | 0.914146 | 0.000300 |
| ELN         | 0.894526 | 0.000001 |
| AADAC       | 0.869212 | 0.000001 |
| DLGAP1      | 0.867194 | 0.000022 |
| LDHD        | 0.864069 | 0.041944 |
| CSMD2       | 0.829532 | 0.000003 |
| ID4         | 0.820003 | 0.008034 |
| THBD        | 0.818228 | 0.000001 |
| DTX4        | 0.812015 | 0.006819 |
| DDIT4L      | 0.792355 | 0.000001 |
| MYO16       | 0.783680 | 0.026187 |
| ERBB3       | 0.778837 | 0.005481 |
| SPOPL       | 0.766919 | 0.000001 |
| PCSK9       | 0.761667 | 0.000001 |
| ACVRL1      | 0.760331 | 0.006684 |
| SAA1        | 0.756485 | 0.000002 |
| GREM2       | 0.747036 | 0.000003 |

\*FDR $\leq$ 0.05, adjusted p-values of less than 0.000001 are listed as 0.000001

Supplemental Table 4B: 4-OH-PCB52 downregulated genes at day 1 (top 50, fold-change)

| symbol     | Log2fc    | adjpv*   |
|------------|-----------|----------|
| RPL22P1    | -9.368962 | 0.005040 |
| SAPCD1     | -2.264356 | 0.013383 |
| PSD        | -2.106167 | 0.043827 |
| APCDD1L-DT | -1.858937 | 0.014476 |
| DPT        | -1.740117 | 0.000765 |
| NPTX1      | -1.716764 | 0.003331 |
| ADAM8      | -1.516984 | 0.021778 |
| COLEC12    | -1.383076 | 0.000001 |
| KRT15      | -1.325332 | 0.029598 |
| SLC13A4    | -1.323899 | 0.048321 |
| RIPOR3     | -1.310317 | 0.000030 |
| FNDC5      | -1.253804 | 0.002260 |
| KCNIP3     | -1.159117 | 0.031003 |
| ZNF154     | -1.138258 | 0.000586 |
| PKNOX2     | -1.104778 | 0.000001 |
| PLEKHA6    | -1.013367 | 0.037693 |
| DNER       | -1.011259 | 0.000001 |
| FAM229A    | -1.007994 | 0.038220 |
| YJEFN3     | -0.979708 | 0.010123 |
| TMEM119    | -0.937437 | 0.008249 |
| LINC00106  | -0.926588 | 0.026366 |
| NFATC2     | -0.919989 | 0.024572 |
| CHI3L1     | -0.917694 | 0.001368 |
| SPTBN5     | -0.912806 | 0.012423 |
| MCOLN3     | -0.898248 | 0.000001 |
| MIAT       | -0.890189 | 0.000001 |
| MCF2L      | -0.860701 | 0.005017 |
| HOXB-AS1   | -0.852730 | 0.036198 |
| MAMDC4     | -0.834455 | 0.008964 |
| SLC23A3    | -0.834296 | 0.037497 |
| MLPH       | -0.827240 | 0.000001 |
| IGFBP2     | -0.824104 | 0.048849 |
| GALNT16    | -0.813505 | 0.000001 |
| QRICH2     | -0.795576 | 0.005682 |
| STX1B      | -0.774487 | 0.032145 |
| AVIL       | -0.773917 | 0.012746 |
| ITGA7      | -0.770657 | 0.000001 |
| VAT1L      | -0.769037 | 0.001204 |
| MXRA5      | -0.765118 | 0.001210 |
| ABCA10     | -0.762596 | 0.009545 |
| SAMD3      | -0.758906 | 0.005204 |
| ADAMTS14   | -0.758696 | 0.000149 |
| CCNJL      | -0.755524 | 0.003665 |
| CLEC2D     | -0.744178 | 0.005033 |
| ALPL       | -0.733834 | 0.009800 |
| HHAT       | -0.730707 | 0.003645 |
| ADCY4      | -0.724663 | 0.001106 |
| PCDHGA4    | -0.717247 | 0.014383 |
| LIF        | -0.716970 | 0.000001 |
| SERTAD4    | -0.715722 | 0.008034 |

\*FDR≤0.05, adjusted p-values of less than 0.000001 are listed as 0.000001

Supplemental Table 5A: PCB52 upregulated genes at day 3 (top 50, fold-change)

| symbol   | Log2fc   | adjpv    |
|----------|----------|----------|
| F2RL1    | 1.304003 | 0.000004 |
| TENM2    | 1.031884 | 0.022488 |
| NR3C2    | 0.757756 | 0.007813 |
| TFPI2    | 0.752925 | 0.000001 |
| DNER     | 0.663111 | 0.000003 |
| NEGR1    | 0.655679 | 0.000001 |
| BMP6     | 0.603729 | 0.017494 |
| CXCL8    | 0.570025 | 0.000001 |
| HHIP-AS1 | 0.569831 | 0.008604 |
| CCL11    | 0.560843 | 0.020465 |
| PDE7B    | 0.546213 | 0.000001 |
| HHIP     | 0.523675 | 0.000350 |
| HAS2     | 0.521412 | 0.000085 |
| HECW2    | 0.517401 | 0.029862 |
| ESM1     | 0.509067 | 0.001575 |
| CXCL1    | 0.504813 | 0.000001 |
| SCG2     | 0.498814 | 0.044020 |
| PACC1    | 0.495267 | 0.005009 |
| STC1     | 0.485930 | 0.000571 |
| VPS33B   | 0.481765 | 0.033684 |
| CXCL6    | 0.478883 | 0.000001 |
| GK       | 0.478783 | 0.000005 |
| BCYRN1   | 0.476872 | 0.000034 |
| MMP1     | 0.476135 | 0.000008 |
| SNX8     | 0.468651 | 0.000003 |
| INSYN2B  | 0.465350 | 0.000323 |
| ACKR3    | 0.444258 | 0.000108 |
| PI16     | 0.435642 | 0.000001 |
| PID1     | 0.430842 | 0.000001 |
| TGM2     | 0.427867 | 0.000003 |
| METTL18  | 0.426099 | 0.029597 |
| CLDN1    | 0.425029 | 0.000001 |
| FBXL2    | 0.417021 | 0.007384 |
| PAX8     | 0.416420 | 0.019819 |
| ZSWIM7   | 0.411776 | 0.017971 |
| LRTOMT   | 0.411318 | 0.040005 |
| GNG11    | 0.406185 | 0.000003 |
| SRR      | 0.405827 | 0.043769 |
| P4HA3    | 0.405199 | 0.048290 |
| BOLA1    | 0.402368 | 0.034800 |
| MME      | 0.399485 | 0.000232 |
| TMEM38B  | 0.399438 | 0.007956 |
| SPP1     | 0.397256 | 0.025195 |
| ZBTB14   | 0.396584 | 0.001832 |
| CXCL3    | 0.395626 | 0.037247 |
| FGF7     | 0.394256 | 0.000027 |
| MED31    | 0.388654 | 0.014857 |
| FNDC1    | 0.387896 | 0.014736 |
| DAW1     | 0.386903 | 0.005694 |
| TNC      | 0.378754 | 0.000025 |

\*FDR $\leq$ 0.05, adjusted p-values of less than 0.000001 are listed as 0.000001

Supplemental Table 5B: PCB52 downregulated genes at day 3 (top 50, fold-change)

| symbol   | Log2fc    | adjpv    |
|----------|-----------|----------|
| PLA2G4B  | -1.318715 | 0.001383 |
| COLEC12  | -0.829767 | 0.000010 |
| CYP26B1  | -0.811385 | 0.015975 |
| AADAC    | -0.765933 | 0.000143 |
| TNFRSF25 | -0.672185 | 0.023222 |
| EPHB6    | -0.650110 | 0.000295 |
| NPIP3    | -0.607900 | 0.006280 |
| PLIN2    | -0.583441 | 0.000001 |
| HELZ2    | -0.561667 | 0.005268 |
| CPT1A    | -0.538934 | 0.000001 |
| STEAP4   | -0.537693 | 0.012773 |
| PGGHG    | -0.537628 | 0.010853 |
| PPP1R13B | -0.494256 | 0.035545 |
| ACSS1    | -0.485262 | 0.001967 |
| IFIT3    | -0.483672 | 0.007027 |
| KCND3    | -0.482369 | 0.005127 |
| ARHGAP39 | -0.476538 | 0.039053 |
| RIPOR3   | -0.471882 | 0.016134 |
| XAF1     | -0.471854 | 0.035545 |
| SLC25A20 | -0.470677 | 0.000032 |
| RAD54L   | -0.467256 | 0.002154 |
| NEK8     | -0.449964 | 0.044595 |
| ABCC3    | -0.431661 | 0.000005 |
| GUSBP9   | -0.429071 | 0.035610 |
| GABRE    | -0.415145 | 0.014840 |
| RGS7BP   | -0.413210 | 0.000002 |
| CPEB3    | -0.407899 | 0.021678 |
| CFI      | -0.407276 | 0.001368 |
| NSUN5P2  | -0.406968 | 0.017494 |
| IFIH1    | -0.406510 | 0.041856 |
| CPA4     | -0.400935 | 0.000001 |
| CDK5R1   | -0.398103 | 0.033938 |
| WASH4P   | -0.383433 | 0.004152 |
| HOXB6    | -0.383227 | 0.010359 |
| TEPSIN   | -0.380987 | 0.021740 |
| RECQL5   | -0.380881 | 0.034371 |
| SFRP4    | -0.380532 | 0.001277 |
| TACC2    | -0.377720 | 0.010416 |
| DHRS3    | -0.371759 | 0.000196 |
| SDHAP3   | -0.363515 | 0.041737 |
| SFI1     | -0.356068 | 0.027600 |
| SBSPON   | -0.355748 | 0.015832 |
| VASH1    | -0.353514 | 0.021018 |
| TAF1C    | -0.349724 | 0.046547 |
| ALDH1A3  | -0.348409 | 0.000001 |
| STAG3L3  | -0.346984 | 0.003237 |
| PASK     | -0.343848 | 0.041632 |
| POLD1    | -0.335224 | 0.032174 |
| NEAT1    | -0.334858 | 0.023222 |
| AFG3L1P  | -0.334280 | 0.041856 |

\*FDR $\leq$ 0.05, adjusted p-values of less than 0.000001 are listed as 0.000001

Supplemental Table 6A: 4-OH-PCB52 upregulated genes at day 3 (top 50, fold-change)

| symbol      | Log2fc   | adjpv*   |
|-------------|----------|----------|
| STMN2       | 3.042435 | 0.000001 |
| CDH6        | 1.903732 | 0.008140 |
| TDRD9       | 1.807690 | 0.000302 |
| PPP1R14C    | 1.625043 | 0.004350 |
| CRLF1       | 1.539830 | 0.000011 |
| ADH1B       | 1.538951 | 0.000047 |
| AADAC       | 1.485455 | 0.000001 |
| PTPRZ1      | 1.485246 | 0.000654 |
| SPACA6P-AS  | 1.471516 | 0.031082 |
| EMCN        | 1.468527 | 0.008545 |
| COLQ        | 1.399877 | 0.037462 |
| FGL2        | 1.370468 | 0.000001 |
| PPP1R26-AS1 | 1.322106 | 0.015084 |
| ATP2A1-AS1  | 1.230337 | 0.032165 |
| XPNPEP2     | 1.222694 | 0.024947 |
| RIMS4       | 1.219392 | 0.015092 |
| PI16        | 1.136704 | 0.000001 |
| NXPH2       | 1.098027 | 0.000001 |
| PDE1A       | 1.081719 | 0.000724 |
| G0S2        | 1.077442 | 0.000965 |
| CHN2        | 1.010617 | 0.036205 |
| TRPM3       | 1.008080 | 0.000058 |
| CYS1        | 0.971851 | 0.025449 |
| PALM        | 0.922877 | 0.000001 |
| SBSPON      | 0.918469 | 0.000001 |
| IL7         | 0.890663 | 0.000001 |
| IFITM10     | 0.874474 | 0.036572 |
| IGSF10      | 0.856447 | 0.025918 |
| PTGER3      | 0.835859 | 0.002574 |
| PTCHD4      | 0.832944 | 0.000226 |
| ADHFE1      | 0.832286 | 0.011701 |
| PLIN2       | 0.825512 | 0.000001 |
| METTL24     | 0.819727 | 0.001761 |
| GPC4        | 0.810795 | 0.001822 |
| C10orf90    | 0.801456 | 0.017737 |
| B3GALT2     | 0.760104 | 0.010268 |
| MYO16       | 0.745641 | 0.016799 |
| CD34        | 0.723612 | 0.000001 |
| SPRY1       | 0.695359 | 0.039428 |
| P3H2        | 0.681685 | 0.008053 |
| DTX4        | 0.680336 | 0.009041 |
| PENK        | 0.662946 | 0.012384 |
| CYGB        | 0.657996 | 0.011976 |
| ZNF667-AS1  | 0.652896 | 0.033924 |
| IL26        | 0.651553 | 0.000285 |
| KCNQ3       | 0.626862 | 0.001231 |
| CAVIN2      | 0.617160 | 0.000004 |
| GPX3        | 0.609421 | 0.000001 |
| SIPA1L2     | 0.595763 | 0.002692 |
| SPOPL       | 0.592449 | 0.000001 |

\*FDR $\leq$ 0.05, adjusted p-values of less than 0.000001 are listed as 0.000001

Supplemental Table 6B: 4-OH-PCB52 downregulated genes at day 3 (top 50, fold-change)

| symbol    | Log2fc    | adjpv*   |
|-----------|-----------|----------|
| PVRIG2P   | -7.508239 | 0.000663 |
| ZNF671    | -2.339075 | 0.002209 |
| CCDC190   | -1.706624 | 0.001115 |
| APCDD1L   | -1.491001 | 0.000001 |
| TNFRSF11A | -1.310133 | 0.000741 |
| RIMS1     | -1.252947 | 0.040348 |
| MMP1      | -1.216813 | 0.000001 |
| DPT       | -1.203607 | 0.005663 |
| SERTAD4   | -1.184138 | 0.000017 |
| BEX1      | -1.150646 | 0.000001 |
| ACTG2     | -1.099449 | 0.012972 |
| NXF3      | -1.083458 | 0.000001 |
| PCDH10    | -1.051205 | 0.000005 |
| OASL      | -1.035911 | 0.018382 |
| SLC28A3   | -1.027295 | 0.004323 |
| CCNJL     | -1.018055 | 0.000124 |
| LTF       | -0.996177 | 0.000120 |
| KIAA0408  | -0.979244 | 0.001950 |
| ROBO4     | -0.973190 | 0.018833 |
| HHAT      | -0.950967 | 0.000381 |
| IGFBP2    | -0.943078 | 0.030018 |
| NR4A3     | -0.921986 | 0.034586 |
| LIF       | -0.892138 | 0.000001 |
| ABCG2     | -0.877864 | 0.007352 |
| LRRC15    | -0.872425 | 0.000001 |
| RASSF2    | -0.835682 | 0.032745 |
| WNT5B     | -0.823335 | 0.000001 |
| KRT34     | -0.809349 | 0.000001 |
| CCL11     | -0.798825 | 0.001717 |
| PKNOX2    | -0.797828 | 0.001231 |
| ADCY4     | -0.766484 | 0.000903 |
| UCN2      | -0.744362 | 0.002790 |
| ZNF551    | -0.740425 | 0.000198 |
| DNER      | -0.730832 | 0.000044 |
| SCN3A     | -0.728815 | 0.000001 |
| IL1A      | -0.714614 | 0.000001 |
| HES1      | -0.696287 | 0.008853 |
| RASGRP1   | -0.687109 | 0.002172 |
| ALG14     | -0.667623 | 0.017116 |
| TGM2      | -0.627480 | 0.000001 |
| MRAP2     | -0.622755 | 0.042194 |
| MLPH      | -0.619986 | 0.004986 |
| SCUBE3    | -0.616643 | 0.000040 |
| EGR1      | -0.614303 | 0.000001 |
| KRT14     | -0.611355 | 0.000001 |
| PLS1      | -0.606381 | 0.005762 |
| ADAMTS14  | -0.598242 | 0.022239 |
| COCH      | -0.583534 | 0.000006 |
| COL7A1    | -0.580943 | 0.000004 |
| MICAL1    | -0.576692 | 0.000001 |

\*FDR $\leq$ 0.05, adjusted p-values of less than 0.000001 are listed as 0.000001

Supplemental Table 7: PCB52 induced gene changes across all time points

| <b>Gene Symbol</b> | <b>Entrez ID</b> | <b>logFC 9h</b> | <b>p-value</b> | <b>logFC 1d</b> | <b>p-value</b> | <b>logFC 3d</b> | <b>p-value</b> |
|--------------------|------------------|-----------------|----------------|-----------------|----------------|-----------------|----------------|
| TFPI2              | 7980             | 0.594026        | 0.000001       | 0.637349        | 0.000001       | 0.752925        | 0.000001       |
| STC1               | 6781             | 0.469472        | 0.02514        | 0.58771         | 0.025202       | 0.48593         | 0.000571       |
| PDE7B              | 27115            | 0.460571        | 0.000633       | 0.849403        | 0.000001       | 0.546213        | 0.000001       |
| FGF7               | 2252             | 0.337375        | 0.008911       | 0.303552        | 0.032634       | 0.394256        | 2.66E-05       |
| RGS7BP             | 401190           | -0.42626        | 2.91E-06       | -0.38038        | 2.90E-05       | -0.41321        | 2.25E-06       |
| CPT1A              | 1374             | -0.49684        | 0.000001       | -0.58285        | 0.000001       | -0.53893        | 0.000001       |
| SLC25A20           | 788              | -0.62242        | 0.000001       | -0.69576        | 0.000001       | -0.47068        | 3.18E-05       |
| PLIN2              | 123              | -0.83136        | 0.000001       | -0.7254         | 0.000001       | -0.58344        | 0.000001       |

Supplemental Table 8: 4-OH-PCB52 induced changes across all time points

| Gene     | Entrez ID | logFC 9h | p-value  | logFC d1 | p-value  | LogFC d3 | p-value  |
|----------|-----------|----------|----------|----------|----------|----------|----------|
| STMN2    | 11075     | 2.837    | 1.00E-06 | 2.481    | 1.00E-06 | 3.042    | 1.00E-06 |
| FGL2     | 10875     | 2.029    | 1.00E-06 | 1.774    | 1.00E-06 | 1.37     | 1.00E-06 |
| CD34     | 947       | 1.565    | 1.00E-06 | 1.511    | 1.00E-06 | 0.724    | 1.00E-06 |
| EMCN     | 51705     | 1.37     | 9.98E-04 | 1.603    | 6.59E-05 | 1.469    | 0.009    |
| PI16     | 221476    | 1.348    | 1.00E-06 | 1.219    | 1.00E-06 | 1.137    | 1.00E-06 |
| NXPH2    | 11249     | 1.149    | 1.00E-06 | 1.108    | 1.00E-06 | 1.098    | 1.00E-06 |
| DDIT4L   | 115265    | 1.117    | 1.00E-06 | 0.792    | 1.00E-06 | 0.562    | 2.35E-04 |
| CAVIN2   | 8436      | 1.044    | 1.00E-06 | 0.925    | 1.00E-06 | 0.617    | 4.41E-06 |
| PTPRZ1   | 5803      | 0.911    | 0.042    | 1.401    | 4.18E-04 | 1.485    | 6.54E-04 |
| SBSPON   | 157869    | 0.826    | 1.00E-06 | 1.113    | 1.00E-06 | 0.918    | 1.00E-06 |
| ELN      | 2006      | 0.819    | 1.00E-06 | 0.895    | 1.00E-06 | 0.554    | 6.28E-05 |
| MYO16    | 23026     | 0.801    | 0.009    | 0.784    | 0.026    | 0.746    | 0.017    |
| METTL24  | 728464    | 0.786    | 0.009    | 1.119    | 1.14E-05 | 0.82     | 0.002    |
| AADAC    | 13        | 0.76     | 1.00E-06 | 0.869    | 1.00E-06 | 1.485    | 1.00E-06 |
| SAA1     | 6288      | 0.758    | 1.00E-06 | 0.756    | 1.82E-06 | 0.411    | 2.68E-05 |
| ADGRD1   | 283383    | 0.752    | 1.00E-06 | 0.617    | 1.00E-06 | 0.345    | 1.00E-06 |
| PALM     | 5064      | 0.711    | 7.04E-05 | 0.692    | 1.13E-04 | 0.923    | 1.00E-06 |
| THBD     | 7056      | 0.672    | 1.00E-06 | 0.818    | 1.00E-06 | 0.542    | 0.014    |
| CRLF1    | 9244      | 0.657    | 0.049    | 1.731    | 1.00E-06 | 1.54     | 1.11E-05 |
| ZNF521   | 25925     | 0.652    | 0.001    | 0.587    | 0.004    | 0.494    | 0.05     |
| MFAP5    | 8076      | 0.646    | 1.00E-06 | 0.678    | 1.00E-06 | 0.376    | 1.00E-06 |
| SPOPL    | 339745    | 0.642    | 1.00E-06 | 0.767    | 1.00E-06 | 0.592    | 1.00E-06 |
| CYGB     | 114757    | 0.594    | 0.023    | 0.694    | 0.006    | 0.658    | 0.012    |
| PLXNA2   | 5362      | 0.594    | 1.00E-06 | 0.455    | 1.00E-06 | 0.333    | 0.004    |
| C3       | 718       | 0.591    | 5.28E-05 | 0.595    | 5.36E-05 | 0.481    | 0.007    |
| GPC4     | 2239      | 0.58     | 0.028    | 0.631    | 0.012    | 0.811    | 0.002    |
| BCYRN1   | 618       | 0.573    | 1.00E-06 | 0.665    | 1.00E-06 | 0.571    | 1.00E-06 |
| CRIP1    | 1396      | 0.57     | 1.00E-06 | 0.729    | 1.00E-06 | 0.535    | 1.93E-05 |
| VTN      | 7448      | 0.569    | 0.003    | 0.487    | 0.02     | 0.547    | 0.005    |
| GPX3     | 2878      | 0.559    | 1.00E-06 | 0.705    | 1.00E-06 | 0.609    | 1.00E-06 |
| FMOD     | 2331      | 0.555    | 1.00E-06 | 0.533    | 1.00E-06 | 0.547    | 1.00E-06 |
| FLT1     | 2321      | 0.531    | 3.52E-04 | 0.611    | 1.26E-04 | 0.558    | 0.004    |
| PODN     | 127435    | 0.513    | 1.00E-06 | 0.49     | 1.00E-06 | 0.447    | 1.00E-06 |
| KCND2    | 3751      | 0.499    | 2.22E-04 | 0.325    | 0.028    | 0.394    | 0.008    |
| ID2      | 3398      | 0.485    | 1.00E-06 | 0.391    | 1.00E-06 | 0.317    | 1.00E-06 |
| PENK     | 5179      | 0.479    | 0.005    | 0.649    | 1.96E-05 | 0.663    | 0.012    |
| PDE3A    | 5139      | 0.472    | 5.08E-06 | 0.365    | 0.004    | 0.45     | 3.95E-04 |
| COL15A1  | 1306      | 0.452    | 0.001    | 0.404    | 0.004    | 0.524    | 1.42E-05 |
| WNT2     | 7472      | 0.431    | 1.00E-06 | 0.496    | 1.00E-06 | 0.389    | 1.00E-06 |
| PLTP     | 5360      | 0.414    | 1.00E-06 | 0.387    | 1.00E-06 | 0.343    | 1.00E-06 |
| SERPING1 | 710       | 0.408    | 1.00E-06 | 0.313    | 3.96E-04 | 0.345    | 1.82E-04 |
| IGFBP3   | 3486      | 0.394    | 1.00E-06 | 0.43     | 1.00E-06 | 0.385    | 1.00E-06 |
| FBLN2    | 2199      | 0.392    | 1.00E-06 | 0.44     | 1.00E-06 | 0.361    | 1.00E-06 |
| MAL2     | 114569    | 0.386    | 2.08E-04 | 0.728    | 1.00E-06 | 0.464    | 7.53E-06 |
| TNXB     | 7148      | 0.375    | 1.00E-06 | 0.378    | 1.00E-06 | 0.437    | 1.00E-06 |
| CXCL5    | 6374      | 0.374    | 2.82E-04 | 0.362    | 1.62E-04 | 0.371    | 3.42E-06 |
| LACC1    | 144811    | 0.332    | 1.00E-06 | 0.588    | 1.00E-06 | 0.399    | 1.00E-06 |
| STARD5   | 80765     | 0.331    | 0.023    | 0.375    | 0.005    | 0.405    | 0.004    |
| FRAS1    | 80144     | 0.321    | 1.27E-04 | 0.327    | 8.13E-05 | 0.35     | 1.07E-04 |
| FHL1     | 2273      | 0.316    | 1.00E-06 | 0.511    | 1.00E-06 | 0.493    | 1.00E-06 |
| S100A4   | 6275      | 0.307    | 0.007    | 0.54     | 1.00E-06 | 0.534    | 1.00E-06 |
| EFEMP1   | 2202      | 0.305    | 1.00E-06 | 0.354    | 1.00E-06 | 0.387    | 1.00E-06 |



|         |        |        |          |        |          |        |          |
|---------|--------|--------|----------|--------|----------|--------|----------|
| BIRC3   | 330    | -0.333 | 5.79E-05 | -0.323 | 3.85E-05 | -0.328 | 8.26E-05 |
| ACKR3   | 57007  | -0.336 | 0.012    | -0.368 | 0.002    | -0.474 | 2.35E-04 |
| ANPEP   | 290    | -0.336 | 1.00E-06 | -0.32  | 1.00E-06 | -0.308 | 1.00E-06 |
| COL7A1  | 1294   | -0.369 | 0.003    | -0.451 | 1.36E-04 | -0.581 | 3.75E-06 |
| DAB2IP  | 153090 | -0.424 | 1.00E-06 | -0.477 | 1.00E-06 | -0.377 | 1.00E-06 |
| LRIG1   | 26018  | -0.441 | 1.00E-06 | -0.372 | 1.00E-06 | -0.509 | 1.00E-06 |
| PDLIM1  | 9124   | -0.457 | 1.00E-06 | -0.481 | 1.00E-06 | -0.359 | 1.00E-06 |
| SCN3A   | 6328   | -0.476 | 1.00E-06 | -0.528 | 1.00E-06 | -0.729 | 1.00E-06 |
| UCN2    | 90226  | -0.498 | 0.004    | -0.614 | 6.17E-04 | -0.744 | 0.003    |
| COCH    | 1690   | -0.507 | 1.97E-05 | -0.593 | 1.00E-06 | -0.584 | 5.73E-06 |
| DENND2A | 27147  | -0.519 | 0.022    | -0.572 | 0.002    | -0.437 | 0.005    |
| COL4A6  | 1288   | -0.522 | 1.05E-04 | -0.346 | 0.015    | -0.51  | 9.39E-04 |
| PCDH10  | 57575  | -0.535 | 0.012    | -0.501 | 0.029    | -1.051 | 5.31E-06 |
| DYSF    | 8291   | -0.573 | 1.00E-06 | -0.482 | 2.18E-05 | -0.525 | 2.89E-05 |
| SLC7A2  | 6542   | -0.603 | 6.07E-04 | -0.513 | 0.044    | -0.49  | 0.039    |
| SERTAD4 | 56256  | -0.613 | 0.034    | -0.716 | 0.008    | -1.184 | 1.73E-05 |
| NXF3    | 56000  | -0.619 | 1.18E-04 | -0.557 | 3.10E-04 | -1.083 | 1.00E-06 |
| GALNT16 | 57452  | -0.627 | 9.60E-05 | -0.814 | 1.00E-06 | -0.385 | 0.036    |
| MCOLN3  | 55283  | -0.641 | 1.00E-06 | -0.898 | 1.00E-06 | -0.475 | 8.66E-06 |
| TNC     | 3371   | -0.641 | 1.00E-06 | -0.422 | 1.00E-06 | -0.47  | 1.00E-06 |
| APCDD1L | 164284 | -0.675 | 9.52E-04 | -0.562 | 0.013    | -1.491 | 1.00E-06 |
| BEX1    | 55859  | -0.675 | 1.00E-06 | -0.425 | 1.00E-06 | -1.151 | 1.00E-06 |
| LIF     | 3976   | -0.709 | 1.00E-06 | -0.717 | 1.00E-06 | -0.892 | 1.00E-06 |
| FHDC1   | 85462  | -0.724 | 1.00E-06 | -0.672 | 1.00E-06 | -0.507 | 1.00E-06 |
| NPTXR   | 23467  | -0.741 | 1.00E-06 | -0.407 | 2.93E-04 | -0.443 | 4.20E-04 |
| SCUBE3  | 222663 | -0.786 | 1.00E-06 | -0.575 | 1.00E-06 | -0.617 | 4.04E-05 |
| ITGA7   | 3679   | -0.793 | 1.00E-06 | -0.771 | 1.00E-06 | -0.56  | 1.00E-06 |
| SECTM1  | 6398   | -0.844 | 1.00E-06 | -0.686 | 1.00E-06 | -0.476 | 2.36E-05 |
| IGFBP2  | 3485   | -0.868 | 0.044    | -0.824 | 0.049    | -0.943 | 0.03     |
| WNT5B   | 81029  | -0.888 | 1.00E-06 | -0.543 | 1.00E-06 | -0.823 | 1.00E-06 |
| MMP1    | 4312   | -0.96  | 1.00E-06 | -0.548 | 1.00E-06 | -1.217 | 1.00E-06 |
| DNER    | 92737  | -0.968 | 1.00E-06 | -1.011 | 1.00E-06 | -0.731 | 4.43E-05 |
| CCL2    | 6347   | -1.026 | 1.00E-06 | -0.65  | 1.00E-06 | -0.527 | 1.00E-06 |
| MLPH    | 79083  | -1.083 | 1.00E-06 | -0.827 | 1.00E-06 | -0.62  | 0.005    |
| FRMPD4  | 9758   | -1.105 | 1.00E-06 | -0.682 | 7.93E-05 | -0.457 | 0.038    |
| RRAD    | 6236   | -1.153 | 1.00E-06 | -0.541 | 1.00E-06 | -0.348 | 0.01     |
| DPT     | 1805   | -1.67  | 0.018    | -1.74  | 7.65E-04 | -1.204 | 0.006    |
| PKNOX2  | 63876  | -1.835 | 1.00E-06 | -1.105 | 1.00E-06 | -0.798 | 0.001    |

Supplemental Table 9: Biological pathways altered by PCB52 at 9 hours

| <b>Biological Pathway</b>              | <b>countDE</b> | <b>countAll</b> | <b>pv</b> |
|----------------------------------------|----------------|-----------------|-----------|
| PPAR signaling pathway                 | 4              | 45              | 0.000277  |
| Insulin resistance                     | 4              | 88              | 0.006380  |
| Cytokine-cytokine receptor interaction | 3              | 106             | 0.009259  |

Supplemental Table 10: biological pathways altered by 4-OH-PCB52 at 9 hours

| <b>Biological Pathway</b>                                     | <b>countDE</b> | <b>countAll</b> | <b>pv</b> |
|---------------------------------------------------------------|----------------|-----------------|-----------|
| Viral protein interaction with cytokine and cytokine receptor | 9              | 33              | 9.07E-07  |
| Cytokine-cytokine receptor interaction                        | 16             | 118             | 1.05E-06  |
| Neuroactive ligand-receptor interaction                       | 12             | 81              | 1.3E-05   |
| Complement and coagulation cascades                           | 10             | 42              | 1.41E-05  |
| TNF signaling pathway                                         | 14             | 96              | 2.95E-05  |
| TGF-beta signaling pathway                                    | 12             | 74              | 5.02E-05  |
| ECM-receptor interaction                                      | 9              | 56              | 0.000477  |
| Signaling pathways regulating pluripotency of stem cells      | 12             | 99              | 0.000609  |
| Transcriptional misregulation in cancer                       | 13             | 118             | 0.000827  |
| Hippo signaling pathway                                       | 13             | 118             | 0.000854  |
| Rheumatoid arthritis                                          | 8              | 56              | 0.001185  |
| Protein digestion and absorption                              | 8              | 53              | 0.001687  |
| Cholesterol metabolism                                        | 5              | 29              | 0.002447  |
| NF-kappa B signaling pathway                                  | 9              | 72              | 0.002765  |
| Apelin signaling pathway                                      | 9              | 104             | 0.003813  |
| IL-17 signaling pathway                                       | 7              | 61              | 0.005016  |
| Renin secretion                                               | 7              | 45              | 0.005620  |
| Arachidonic acid metabolism                                   | 5              | 29              | 0.009646  |
| Focal adhesion                                                | 10             | 158             | 0.017636  |
| Chemokine signaling pathway                                   | 9              | 113             | 0.017695  |
| Human papillomavirus infection                                | 15             | 255             | 0.021398  |
| Wnt signaling pathway                                         | 10             | 110             | 0.021619  |
| Axon guidance                                                 | 9              | 134             | 0.031397  |
| Staphylococcus aureus infection                               | 4              | 28              | 0.033735  |
| Vascular smooth muscle contraction                            | 8              | 88              | 0.033908  |

Supplemental Table 11: Biological pathways altered by PCB52 at day 1

| <b>Biological Pathway</b>               | <b>countDE</b> | <b>countAll</b> | <b>pv</b> |
|-----------------------------------------|----------------|-----------------|-----------|
| Neuroactive ligand-receptor interaction | 3              | 59              | 0.001174  |
| Fatty acid degradation                  | 3              | 33              | 0.002418  |
| Fatty acid metabolism                   | 3              | 49              | 0.006758  |
| Breast cancer                           | 4              | 97              | 0.007708  |
| Cell adhesion molecules                 | 3              | 60              | 0.011221  |
| Morphine addiction                      | 2              | 43              | 0.015965  |
| Melanogenesis                           | 3              | 63              | 0.019468  |
| Vascular smooth muscle contraction      | 2              | 79              | 0.025284  |
| cGMP-PKG signaling pathway              | 3              | 102             | 0.028218  |
| PPAR signaling pathway                  | 2              | 45              | 0.029122  |
| Purine metabolism                       | 3              | 90              | 0.029549  |
| Hematopoietic cell lineage              | 2              | 32              | 0.032317  |
| HIF-1 signaling pathway                 | 2              | 82              | 0.040807  |
| Fluid shear stress and atherosclerosis  | 3              | 106             | 0.043758  |
| Transcriptional misregulation in cancer | 3              | 113             | 0.049259  |

Supplemental Table 12: Biological pathways altered by 4-OH-PCB52 at day 1

| <b>Biological Pathway</b>                                | <b>countDE</b> | <b>countAll</b> | <b>pv</b> |
|----------------------------------------------------------|----------------|-----------------|-----------|
| ECM-receptor interaction                                 | 9              | 59              | 0.000703  |
| Neuroactive ligand-receptor interaction                  | 10             | 85              | 0.000763  |
| TGF-beta signaling pathway                               | 9              | 75              | 0.001639  |
| Complement and coagulation cascades                      | 7              | 42              | 0.001733  |
| Rheumatoid arthritis                                     | 7              | 56              | 0.003154  |
| Taste transduction                                       | 5              | 23              | 0.004399  |
| Cytokine-cytokine receptor interaction                   | 11             | 126             | 0.004758  |
| Linoleic acid metabolism                                 | 3              | 8               | 0.005900  |
| Arrhythmogenic right ventricular cardiomyopathy          | 6              | 50              | 0.007227  |
| Arachidonic acid metabolism                              | 5              | 30              | 0.007935  |
| Transcriptional misregulation in cancer                  | 10             | 118             | 0.012527  |
| Cholesterol metabolism                                   | 4              | 29              | 0.012832  |
| Apelin signaling pathway                                 | 8              | 106             | 0.013084  |
| Signaling pathways regulating pluripotency of stem cells | 9              | 101             | 0.013898  |
| Wnt signaling pathway                                    | 9              | 110             | 0.015331  |
| alpha-Linolenic acid metabolism                          | 3              | 12              | 0.017874  |
| Focal adhesion                                           | 11             | 160             | 0.019932  |
| Protein digestion and absorption                         | 6              | 56              | 0.023737  |
| Hippo signaling pathway                                  | 8              | 119             | 0.027494  |
| Human papillomavirus infection                           | 14             | 259             | 0.029324  |
| Vascular smooth muscle contraction                       | 7              | 89              | 0.029912  |
| Cushing syndrome                                         | 7              | 114             | 0.038913  |
| Melanogenesis                                            | 5              | 70              | 0.041951  |
| Calcium signaling pathway                                | 9              | 119             | 0.043122  |
| Dilated cardiomyopathy                                   | 5              | 59              | 0.046690  |

Supplemental Table 13: Biological pathways altered by PCB52 at day 3

| <b>Biological Pathway</b>                                     | <b>countDE</b> | <b>countAll</b> | <b>pv</b> |
|---------------------------------------------------------------|----------------|-----------------|-----------|
| Chemokine signaling pathway                                   | 9              | 104             | 2.56E-08  |
| Cytokine-cytokine receptor interaction                        | 11             | 95              | 3.20E-08  |
| Viral protein interaction with cytokine and cytokine receptor | 8              | 26              | 1.85E-07  |
| IL-17 signaling pathway                                       | 8              | 57              | 2.51E-06  |
| Rheumatoid arthritis                                          | 8              | 49              | 5E-06     |
| African trypanosomiasis                                       | 2              | 15              | 0.000147  |
| Retinol metabolism                                            | 3              | 16              | 0.003107  |
| PPAR signaling pathway                                        | 4              | 43              | 0.003131  |
| TNF signaling pathway                                         | 5              | 92              | 0.004269  |
| Pertussis                                                     | 4              | 52              | 0.004378  |
| NOD-like receptor signaling pathway                           | 5              | 122             | 0.004637  |
| AGE-RAGE signaling pathway in diabetic complications          | 4              | 85              | 0.007869  |
| Chagas disease                                                | 3              | 67              | 0.010158  |
| Legionellosis                                                 | 3              | 42              | 0.013811  |
| NF-kappa B signaling pathway                                  | 3              | 68              | 0.026355  |
| Amoebiasis                                                    | 4              | 63              | 0.027839  |
| Malaria                                                       | 2              | 22              | 0.031086  |
| Morphine addiction                                            | 3              | 41              | 0.032314  |
| Serotonergic synapse                                          | 3              | 46              | 0.032383  |
| Apelin signaling pathway                                      | 4              | 94              | 0.03255   |
| Long-term depression                                          | 2              | 39              | 0.043755  |
| Ovarian steroidogenesis                                       | 2              | 25              | 0.045988  |

Supplemental Table 14: Biological pathways altered by 4-OH-PCB52 at day 3 (top 25 of 51 shown)

| <b>Biological Pathway</b>                                     | <b>countDE</b> | <b>countAll</b> | <b>pv</b> |
|---------------------------------------------------------------|----------------|-----------------|-----------|
| Rheumatoid arthritis                                          | 10             | 59              | 3.47E-06  |
| Cytokine-cytokine receptor interaction                        | 21             | 130             | 3.86E-06  |
| AGE-RAGE signaling pathway in diabetic complications          | 11             | 91              | 7.26E-06  |
| Hematopoietic cell lineage                                    | 9              | 38              | 7.75E-06  |
| NF-kappa B signaling pathway                                  | 12             | 72              | 7.94E-06  |
| Viral protein interaction with cytokine and cytokine receptor | 8              | 37              | 2.43E-05  |
| TNF signaling pathway                                         | 12             | 98              | 2.74E-05  |
| IL-17 signaling pathway                                       | 9              | 64              | 3.46E-05  |
| Pathways in cancer                                            | 25             | 404             | 5.91E-05  |
| ECM-receptor interaction                                      | 9              | 61              | 7.08E-05  |
| Transcriptional misregulation in cancer                       | 12             | 122             | 0.000219  |
| Pertussis                                                     | 8              | 59              | 0.000446  |
| Fluid shear stress and atherosclerosis                        | 11             | 111             | 0.000488  |
| Human papillomavirus infection                                | 16             | 262             | 0.000811  |
| Malaria                                                       | 5              | 28              | 0.000823  |
| Legionellosis                                                 | 7              | 47              | 0.000975  |
| Basal cell carcinoma                                          | 7              | 48              | 0.00126   |
| PI3K-Akt signaling pathway                                    | 14             | 246             | 0.001632  |
| Focal adhesion                                                | 11             | 161             | 0.002017  |
| Hypertrophic cardiomyopathy                                   | 7              | 59              | 0.002346  |
| Wnt signaling pathway                                         | 10             | 114             | 0.002704  |
| Neuroactive ligand-receptor interaction                       | 6              | 91              | 0.003003  |
| Signaling pathways regulating pluripotency of stem cells      | 9              | 103             | 0.003633  |
| Complement and coagulation cascades                           | 6              | 43              | 0.004425  |
| Dilated cardiomyopathy                                        | 6              | 60              | 0.005348  |

Supplemental Table 15: Upstream regulatory genes across time points for PCB52 or 4-OH-PCB52 treatments

| Gene symbol | PCB52, 9h                  |         | PCB52, 1d                  |         | PCB52, 3d                  |         |
|-------------|----------------------------|---------|----------------------------|---------|----------------------------|---------|
|             | consistent (-)/ DE targets | p-value | consistent (-)/ DE targets | p-value | consistent (-)/ DE targets | p-value |
| PPARA       | 4/5                        | 0.025   | 4/4                        | 0.017   | 5/6                        | 0.029   |
| CREBBP      | 4/5                        | 0.025   | 4/4                        | 0.017   | 2/3                        | 0.649   |
| EP300       | 3/3                        | 0.030   | 4/4                        | 0.017   | 1/2                        | 1.000   |
|             | 4-OH-PCB52, 9h             |         | 4-OH-PCB52, 1d             |         | 4-OH-PCB52, 3d             |         |
| IL17A       | 7/8                        | 0.211   | 7/7                        | 0.023   | 8/9                        | 0.003   |
| PTH         | 6/8                        | 0.241   | 7/9                        | 0.028   | 6/7                        | 0.023   |
